# Supplementary material for: Evaluating Self-Directed Behaviours and Their Association with Emotional Arousal across Two Cognitive Tasks in Bonobos (Pan paniscus)
Source: MDPI journal article supplement (doi:10.3390/ani12213002), 2022-11-01
Supplement: s1 [file s1]

## Supplementary materials

Table S1: Model outputs testing the effects of condition and stimulus type on the rate of SDBs in Study 1

| Nose wipe ~ condition + stimulus |                              |          |       | Chisq     | Df      | P     |       |
|----------------------------------|------------------------------|----------|-------|-----------|---------|-------|-------|
|                                  |                              |          |       | Condition | 0.554   | 2     | 0.758 |
|                                  |                              |          |       | Stimulus  | 3.393   | 2     | 0.183 |
| Fixed factor                     | Contrast                     | Estimate | SE    | df        | t-ratio | P     |       |
| Stimulus                         | Averted – Control            | 0.001    | 0.002 | 5864      | 0.379   | 1.000 |       |
|                                  | Averted – Direct             | -0.002   | 0.001 | 5864      | -1.418  | 0.469 |       |
|                                  | Control - Direct             | -0.003   | 0.002 | 5864      | -1.698  | 0.269 |       |
| Condition                        | Pre-baseline – Post-baseline | 0.0004   | 0.001 | 5744      | 0.236   | 1.000 |       |
|                                  | Pre-baseline – Fusion        | -0.0008  | 0.001 | 5719      | -0.554  | 1.000 |       |
|                                  | Post-baseline - Fusion       | -0.001   | 0.002 | 5870      | -0.719  | 1.000 |       |

| Gentle self-scratch ~ condition + stimulus |                              |          |        | Chisq     | Df      | P            |              |
|--------------------------------------------|------------------------------|----------|--------|-----------|---------|--------------|--------------|
|                                            |                              |          |        | Condition | 0.746   | 2            | 0.689        |
|                                            |                              |          |        | Stimulus  | 6.759   | 2            | <b>0.034</b> |
| Fixed factor                               | Contrast                     | Estimate | SE     | df        | t-ratio | P            |              |
| Stimulus                                   | Averted – Control            | -0.002   | 0.0008 | 5864      | -2.392  | <b>0.050</b> |              |
|                                            | Averted – Direct             | -0.002   | 0.0008 | 5864      | -2.016  | 0.132        |              |
|                                            | Control - Direct             | 0.0004   | 0.0008 | 5864      | 0.524   | 1.000        |              |
| Condition                                  | Pre-baseline – Post-baseline | -0.0005  | 0.0008 | 5710      | -0.582  | 1.000        |              |
|                                            | Pre-baseline – Fusion        | 0.0003   | 0.0008 | 5679      | 0.354   | 1.000        |              |
|                                            | Post-baseline - Fusion       | 0.0008   | 0.0009 | 5870      | 0.853   | 1.000        |              |

| Rough self-scratch ~ condition + stimulus |                              |           |        | Chisq     | Df      | P     |       |
|-------------------------------------------|------------------------------|-----------|--------|-----------|---------|-------|-------|
|                                           |                              |           |        | Condition | 1.349   | 2     | 0.510 |
|                                           |                              |           |        | Stimulus  | 1.737   | 2     | 0.420 |
| Fixed factor                              | Contrast                     | Estimate  | SE     | df        | t-ratio | P     |       |
| Stimulus                                  | Averted – Control            | 0.0007    | 0.0006 | 5865      | 1.179   | 0.715 |       |
|                                           | Averted – Direct             | 0.0006    | 0.0006 | 5865      | 1.070   | 0.854 |       |
|                                           | Control - Direct             | -0.0001   | 0.0006 | 5865      | -0.188  | 1.000 |       |
| Condition                                 | Pre-baseline – Post-baseline | 6.61e-04  | 0.0006 | 4384      | 1.112   | 0.799 |       |
|                                           | Pre-baseline – Fusion        | 8.34e-05  | 0.0006 | 4203      | 0.141   | 1.000 |       |
|                                           | Post-baseline - Fusion       | -5.77e-04 | 0.0007 | 5860      | -0.883  | 1.000 |       |

Table S2: Model outputs testing the effects of stimulus type on the rate of SDBs in Study 2 – Experiment 1

| Nose wipe ~ stimulus           |                         |          |       | Chisq    | Df      | P     |
|--------------------------------|-------------------------|----------|-------|----------|---------|-------|
|                                |                         |          |       | Stimulus |         |       |
|                                |                         |          |       | 1.027    | 2       | 0.599 |
| Fixed factor                   | Contrast                | Estimate | SE    | df       | t-ratio | P     |
| Stimulus                       | Congruent – Control     | -0.003   | 0.004 | 1217     | -0.899  | 1.000 |
|                                | Congruent – Incongruent | -0.004   | 0.004 | 1217     | -0.882  | 1.000 |
|                                | Control – Incongruent   | -0.0002  | 0.004 | 1217     | -0.064  | 1.000 |
| Gentle self-scratch ~ stimulus |                         |          |       | Chisq    | Df      | P     |
|                                |                         |          |       | Stimulus |         |       |
|                                |                         |          |       | 1.565    | 2       | 0.457 |
| Fixed factor                   | Contrast                | Estimate | SE    | df       | t-ratio | P     |
| Stimulus                       | Congruent – Control     | -0.001   | 0.001 | 1218     | -1.070  | 0.855 |
|                                | Congruent – Incongruent | -0.002   | 0.001 | 1218     | -1.127  | 0.780 |
|                                | Control – Incongruent   | -0.0002  | 0.001 | 1218     | -0.160  | 1.000 |
| Rough self-scratch ~ stimulus  |                         |          |       | Chisq    | Df      | P     |
|                                |                         |          |       | Stimulus |         |       |
|                                |                         |          |       | 3.083    | 2       | 0.214 |
| Fixed factor                   | Contrast                | Estimate | SE    | df       | t-ratio | P     |
| Stimulus                       | Congruent – Control     | -0.002   | 0.001 | 1218     | -1.125  | 0.782 |
|                                | Congruent – Incongruent | 0.0008   | 0.001 | 1218     | 0.515   | 1.000 |
|                                | Control – Incongruent   | 0.002    | 0.001 | 1218     | 1.687   | 0.276 |

Table S3: Model outputs testing the effects of stimulus type on the rate of SDBs in Study 2 – Experiment 2

| Nose wipe ~ stimulus           |                     |          |       | Chisq    | Df      | P            |
|--------------------------------|---------------------|----------|-------|----------|---------|--------------|
|                                |                     |          |       | Stimulus |         |              |
|                                |                     |          |       | 8.447    | 3       | <b>0.034</b> |
| Fixed factor                   | Contrast            | Estimate | SE    | df       | t-ratio | P            |
| Stimulus                       | Blank – Negative    | 0.004    | 0.004 | 1817     | 1.035   | 1.000        |
|                                | Blank – Neutral     | 0.009    | 0.004 | 1817     | 2.108   | 0.211        |
|                                | Blank – Positive    | 0.012    | 0.004 | 1817     | 2.655   | <b>0.048</b> |
|                                | Negative – Neutral  | 0.005    | 0.005 | 1817     | 0.995   | 1.000        |
|                                | Negative – Positive | 0.007    | 0.005 | 1817     | 1.504   | 0.796        |
|                                | Neutral - Positive  | 0.002    | 0.005 | 1817     | 0.508   | 1.000        |
| Gentle self-scratch ~ stimulus |                     |          |       | Chisq    | Df      | P            |
|                                |                     |          |       | Stimulus |         |              |
|                                |                     |          |       | 2.006    | 3       | 0.571        |
| Fixed factor                   | Contrast            | Estimate | SE    | df       | t-ratio | P            |
| Stimulus                       | Blank – Negative    | 0.002    | 0.002 | 1817     | 0.957   | 1.000        |
|                                | Blank – Neutral     | 0.002    | 0.002 | 1817     | 0.903   | 1.000        |
|                                | Blank – Positive    | 0.002    | 0.002 | 1817     | 1.315   | 1.000        |
|                                | Negative – Neutral  | -0.00009 | 0.002 | 1817     | -0.050  | 1.000        |
|                                | Negative – Positive | 0.0006   | 0.002 | 1817     | 0.333   | 1.000        |
|                                | Neutral - Positive  | 0.0007   | 0.002 | 1817     | 0.382   | 1.000        |
| Rough self-scratch ~ stimulus  |                     |          |       | Chisq    | Df      | P            |
|                                |                     |          |       | Stimulus |         |              |
|                                |                     |          |       | 2.283    | 3       | 0.516        |
| Fixed factor                   | Contrast            | Estimate | SE    | df       | t-ratio | P            |
| Stimulus                       | Blank – Negative    | -0.002   | 0.001 | 1818     | -1.419  | 0.937        |
|                                | Blank – Neutral     | -0.0003  | 0.001 | 1818     | -0.262  | 1.000        |
|                                | Blank – Positive    | -0.0002  | 0.001 | 1818     | -0.172  | 1.000        |
|                                | Negative – Neutral  | 0.001    | 0.001 | 1817     | 1.071   | 1.000        |
|                                | Negative – Positive | 0.002    | 0.001 | 1817     | 1.153   | 1.000        |
|                                | Neutral - Positive  | 0.0001   | 0.001 | 1817     | 0.083   | 1.000        |

Table S4: Model outputs testing the effects of stimulus type on the rate of SDBs in Study 2 – Experiment 3

| Nose wipe ~ stimulus           |                     |          |       | Chisq    | Df      | P     |
|--------------------------------|---------------------|----------|-------|----------|---------|-------|
|                                |                     |          |       | Stimulus | 3       | 0.142 |
| Fixed factor                   | Contrast            | Estimate | SE    | df       | t-ratio | P     |
| Stimulus                       | Blank – Negative    | 0.001    | 0.005 | 1670     | 0.212   | 1.000 |
|                                | Blank – Neutral     | -0.010   | 0.005 | 1670     | -1.996  | 0.276 |
|                                | Blank – Positive    | -0.001   | 0.005 | 1670     | -0.249  | 1.000 |
|                                | Negative – Neutral  | -0.011   | 0.005 | 1670     | -2.045  | 0.246 |
|                                | Negative – Positive | -0.002   | 0.005 | 1670     | -0.427  | 1.000 |
|                                | Neutral - Positive  | 0.008    | 0.005 | 1670     | 1.620   | 0.633 |
| Gentle self-scratch ~ stimulus |                     |          |       | Chisq    | Df      | P     |
|                                |                     |          |       | Stimulus | 3       | 0.276 |
| Fixed factor                   | Contrast            | Estimate | SE    | df       | t-ratio | P     |
| Stimulus                       | Blank – Negative    | -0.001   | 0.002 | 1670     | -0.715  | 1.000 |
|                                | Blank – Neutral     | -0.0002  | 0.002 | 1670     | -0.087  | 1.000 |
|                                | Blank – Positive    | 0.003    | 0.002 | 1670     | 1.341   | 1.000 |
|                                | Negative – Neutral  | 0.001    | 0.002 | 1670     | 0.587   | 1.000 |
|                                | Negative – Positive | 0.004    | 0.002 | 1670     | 1.905   | 0.342 |
|                                | Neutral - Positive  | 0.003    | 0.002 | 1670     | 1.330   | 1.000 |
| Rough self-scratch ~ stimulus  |                     |          |       | Chisq    | Df      | P     |
|                                |                     |          |       | Stimulus | 3       | 0.348 |
| Fixed factor                   | Contrast            | Estimate | SE    | df       | t-ratio | P     |
| Stimulus                       | Blank – Negative    | 0.0002   | 0.001 | 1670     | 0.197   | 1.000 |
|                                | Blank – Neutral     | 0.001    | 0.001 | 1670     | 1.212   | 1.000 |
|                                | Blank – Positive    | 0.002    | 0.001 | 1670     | 1.553   | 0.724 |
|                                | Negative – Neutral  | 0.001    | 0.001 | 1670     | 0.938   | 1.000 |
|                                | Negative – Positive | 0.002    | 0.001 | 1670     | 1.255   | 1.000 |
|                                | Neutral - Positive  | 0.0004   | 0.001 | 1670     | 0.324   | 1.000 |

Table S5: Rates of SDBs per trial per second for the subjects across the two studies

|                     | Busira               |                     | Habari                |                       |
|---------------------|----------------------|---------------------|-----------------------|-----------------------|
|                     | Study 1              | Study 2             | Study 1               | Study 2               |
| Nose wipe           | $0.018 \pm 0.002$    | $0.036 \pm 0.002$   | $0.009 \pm 0.001$     | $0.011 \pm 0.001$     |
| Rough self-scratch  | $0.0015 \pm 0.0006$  | $0.0026 \pm 0.0007$ | $0.0016 \pm 0.0006$   | $0.0004 \pm 0.0002$   |
| Gentle self-scratch | $0.0051 \pm 0.0011$  | $0.0065 \pm 0.0012$ | $0.0043 \pm 0.001$    | $0.0028 \pm 0.00061$  |
|                     | Kianga               |                     | Kikongo               |                       |
|                     | Study 1              | Study 2             | Study 1               | Study 2               |
| Nose wipe           | $0.017 \pm 0.002$    | NA                  | $0.007 \pm 0.002$     | NA                    |
| Rough self-scratch  | $0.0018 \pm 0.0005$  | NA                  | $0.0001 \pm 0.0001$   | NA                    |
| Gentle self-scratch | $0.0075 \pm 0.0013$  | NA                  | $0.0043 \pm 0.0014$   | NA                    |
|                     | Mokonzi              |                     | Nayembi               |                       |
|                     | Study 1              | Study 2             | Study 1               | Study 2               |
| Nose wipe           | $0.008 \pm 0.001$    | $0.016 \pm 0.002$   | $0.008 \pm 0.002$     | NA                    |
| Rough self-scratch  | $0.0008 \pm 0.0004$  | $0.001 \pm 0.0004$  | $0.0035 \pm 0.0016$   | NA                    |
| Gentle self-scratch | $0.0018 \pm 0.00057$ | $0.003 \pm 0.0007$  | $0.003 \pm 0.00094$   | NA                    |
|                     | Vifijo               |                     | Zamba                 |                       |
|                     | Study 1              | Study 2             | Study 1               | Study 2               |
| Nose wipe           | $0.014 \pm 0.002$    | NA                  | $0.016 \pm 0.002$     | $0.029 \pm 0.002$     |
| Rough self-scratch  | $0.0016 \pm 0.0007$  | NA                  | $0.0008 \pm 0.0004$   | $0.0018 \pm 0.0006$   |
| Gentle self-scratch | $0.0019 \pm 0.00074$ | NA                  | $0.00023 \pm 0.00023$ | $0.00039 \pm 0.00026$ |

Table S6: Post-hoc results of tested predictors in final models testing the effect of trial accuracy and hemispace. Simple contrasts were applied

| <b>Study 1</b>                                   |                                                |          |       |      |         |          |
|--------------------------------------------------|------------------------------------------------|----------|-------|------|---------|----------|
| Nose wipe ~ trial accuracy                       | Contrast                                       | Estimate | SE    | df   | t-ratio | <i>P</i> |
|                                                  | Accuracy: Incorrect - correct                  | 0.007    | 0.003 | 5846 | 2.447   | 0.014    |
| Gentle self-scratch ~ trial accuracy + hemispace | Contrast                                       | Estimate | SE    | df   | t-ratio | <i>P</i> |
|                                                  | Accuracy: Incorrect - correct                  | -0.014   | 0.026 | 220  | -0.526  | 0.600    |
|                                                  | Hemispace: left - right                        | -0.009   | 0.013 | 220  | -0.747  | 0.456    |
| Rough self-scratch ~ trial accuracy + hemispace  | Contrast                                       | Estimate | SE    | df   | t-ratio | <i>P</i> |
|                                                  | Accuracy: Incorrect - correct                  | -0.021   | 0.026 | 217  | -0.903  | 0.367    |
|                                                  | Hemispace: left - right                        | 0.023    | 0.012 | 220  | 1.966   | 0.051    |
| <b>Study 2</b>                                   |                                                |          |       |      |         |          |
| Nose wipe ~ trial accuracy                       | Contrast                                       | Estimate | SE    | df   | t-ratio | <i>P</i> |
|                                                  | Accuracy: Incorrect - correct                  | 0.011    | 0.002 | 4696 | 4.606   | < 0.001  |
| Gentle self-scratch ~ trial accuracy + hemispace | Contrast                                       | Estimate | SE    | df   | t-ratio | <i>P</i> |
|                                                  | Accuracy: Incorrect - correct                  | -0.056   | 0.020 | 119  | -2.886  | 0.005    |
|                                                  | Hemispace: left - right                        | 0.001    | 0.019 | 147  | 0.039   | 0.969    |
| Rough self-scratch ~ trial accuracy * hemispace  | Contrast                                       | Estimate | SE    | df   | t-ratio | <i>P</i> |
|                                                  | Hemispace: Left Accuracy: Incorrect - correct  | 0.107    | 0.024 | 123  | 4.556   | < 0.001  |
|                                                  | Hemispace: Right Accuracy: Incorrect - correct | 0.028    | 0.021 | 145  | 1.311   | 0.192    |
|                                                  | Accuracy: Incorrect Hemispace: left - right    | 0.056    | 0.026 | 135  | 2.250   | 0.026    |
|                                                  | Accuracy: Correct Hemispace: left - right      | -0.022   | 0.018 | 141  | -1.210  | 0.228    |

Table S7: Post-hoc results of tested predictors in final models testing the effect of trial accuracy and hemispace based on the subset of subjects that also participated in Study 2. Simple contrasts were applied.

| <b>Study 1</b>                                   |                               |          |       |      |         |          |
|--------------------------------------------------|-------------------------------|----------|-------|------|---------|----------|
| Nose wipe ~ trial accuracy                       | Contrast                      | Estimate | SE    | df   | t-ratio | <i>P</i> |
|                                                  | Accuracy: Incorrect - correct | 0.022    | 0.005 | 3342 | 4.009   | < 0.001  |
| Gentle self-scratch ~ trial accuracy + hemispace | Contrast                      | Estimate | SE    | df   | t-ratio | <i>P</i> |
|                                                  | Accuracy: Incorrect - correct | -0.016   | 0.038 | 100  | -0.421  | 0.675    |
|                                                  | Hemispace: left - right       | -0.008   | 0.019 | 100  | -0.438  | 0.662    |
| Rough self-scratch ~ trial accuracy + hemispace  | Contrast                      | Estimate | SE    | df   | t-ratio | <i>P</i> |
|                                                  | Accuracy: Incorrect - correct | -0.003   | 0.029 | 100  | -0.107  | 0.915    |
|                                                  | Hemispace: left - right       | 0.023    | 0.014 | 100  | 1.617   | 0.109    |
